# Supplementary material for: 3D hierarchical core–shell spiny globe shaped Co2P@Ni2P/NiCo2O4@CoO for asymmetric supercapacitors
Source: Royal Society of Chemistry journal article supplement (doi:10.1039/d1ta10580a), 2022-01-01
Supplement: d1ta10580a1.pdf [file d1ta10580a1.pdf]

## Supporting Information

### 3D hierarchical core-shell spiny globe shaped $\text{Co}_2\text{P@Ni}_2\text{P/NiCo}_2\text{O}_4\text{@CoO}$ for asymmetric supercapacitors

Wen-Wei Song,<sup>a</sup> Bing Wang,<sup>a</sup> Chen-Ning Li,<sup>a</sup> Shi-Ming Wang,<sup>\*b</sup> and Zheng-Bo Han<sup>\*a</sup>

<sup>a</sup> College of Chemistry, Liaoning University, Shenyang 110036, P. R. China E-mail:

[ceshzb@lnu.edu.cn](mailto:ceshzb@lnu.edu.cn)

<sup>b</sup> Light Industry College, Liaoning University, Shenyang 110036, P. R. China E-mail:

[wangsm@lnu.edu.cn](mailto:wangsm@lnu.edu.cn)

## Summary

S1. Supporting experimental section.

S2. Supporting Figure S1~S28.

S3. Supporting Table S1~S2.

S4. Supplementary Video S1.

## 1. Experimental

### 1.1. Synthesis

#### Synthesis of core-shell spiny globe with dodecahedron-shaped CC-NF

The ZC-NF can be converted into  $\text{Co}_3\text{O}_4/\text{CoO-NF}$  by a heat treatment at  $350^\circ\text{C}$  for 2 h with a heating rate of  $5^\circ\text{C min}^{-1}$  in an air atmosphere. The  $\text{Co}_3\text{O}_4/\text{CoO-NF}$  was denoted as CC-NF, and the XRD pattern of CC-NF is shown in Figure S9.

#### Synthesis of core-shell spiny globe with dodecahedron-shaped CCC-NF

The  $\text{NaH}_2\text{PO}_2\cdot\text{H}_2\text{O}$  (0.030 g, upstream side) and CC-NF (downstream) were placed in one porcelain boat and underwent a thermal treatment at  $300^\circ\text{C}$  for 2 h with a heating rate of  $2^\circ\text{C min}^{-1}$  in an Ar atmosphere to obtain  $\text{Co}_2\text{P}@/\text{Co}_3\text{O}_4/\text{CoO-NF}$  (denoted as CCC-NF), and the XRD pattern of CCC-NF is shown in Figure S10.

#### Synthesis of core-shell spiny globe-shaped P-CNC-NF

The ZC-NF was soaked in the  $\text{Ni}(\text{NO}_3)_2\cdot 6\text{H}_2\text{O}$  and  $\text{NaH}_2\text{PO}_2\cdot\text{H}_2\text{O}$  aqueous solution (2.8 g/L) for 24 h at room temperature to obtain  $\text{Co}_2\text{P}@/\text{Ni}_2\text{P}@/\text{CoO-NF}$  (denoted as P-CNC-NF), and the XRD pattern of P-CNC-NF is shown in Figure S11.

### 1.2. Calculations

#### Density function theory computational methods

The Vienna Ab Initio Package (VASP)<sup>1,2</sup> was employed to perform all the density functional theory (DFT) calculations within the generalized gradient approximation (GGA) using the PBE<sup>3</sup> formulation. The projected augmented wave (PAW) potentials<sup>4, 5</sup> were chosen to describe the ionic cores and take valence electrons into account using a plane wave basis set with a kinetic energy cutoff of 450 eV. Partial occupancies of the Kohn-Sham orbitals

were allowed using the Gaussian smearing method and a width of 0.05 eV. The electronic energy was considered self-consistent when the energy change was smaller than  $10^{-4}$  eV. A geometry optimization was considered convergent when the force change was smaller than 0.05 eV/Å. Grimme's DFT-D3 methodology<sup>6</sup> was used to describe the dispersion interactions. During structural optimizations, the 2×2×1 Monkhorst-Pack k-point grid for Brillouin zone was used for k-point sampling for systems.

### Calculations of single electrode

In a three-electrode system, the areal capacitance of electrode materials was calculated by following equation (1):

$$C_s = \frac{I\Delta t}{S\Delta V} \quad (1)$$

Where  $C_s$  (F cm<sup>-2</sup>) is areal capacitance of electrode materials,  $\Delta t$  (s) represents discharge of galvanostatic charge-discharge,  $I$  (A) is discharge current,  $\Delta V$  (V) is potential window during discharge process and  $S$  (cm<sup>2</sup>) denotes load area of active materials.

In addition, the specific capacitance of electrode materials is calculated in a three-electrode system by following equation (2):

$$C_m = \frac{I\Delta t}{m\Delta V} \quad (2)$$

Where  $C_m$  (F g<sup>-1</sup>) is specific capacitance of electrode materials and  $m$  (g) denotes the mass of active materials.

### Calculations of ASCs device

In order to obtain better electrochemical performance of the device, according to charge balance following the relationship  $Q_+ = Q_-$  of positive electron and negative electron, the mass rate of electron was calculated by following equations (3)-(5):

$$Q = C_m \times \Delta V \times m \quad (3)$$

$$Q_+ = Q_- \quad (4)$$

$$\frac{m^-}{m^+} = \frac{C^+ \times \Delta V^+}{C^- \times \Delta V^-} \quad (5)$$

Where  $Q$  is capacity,  $C_m$  represents specific capacitance of electrode materials,  $m$  (g) is the mass of active materials.  $C^+$  and  $\Delta V^+$  denote specific capacitance and potential window of positive electrode. At the same time,  $C^-$  and  $\Delta V^-$  denote specific capacitance and potential window of negative electrode.

$$E_m = \frac{1000 \times C_m \times \Delta V^2}{2 \times 3600} \quad (6)$$

$$P_m = \frac{3600 \times E_m}{\Delta t} \quad (7)$$

Where  $E_m$  (Wh kg<sup>-1</sup>) is energy density,  $P_m$  (W kg<sup>-1</sup>) is power density,  $\Delta V$  (V) denotes potential window during the discharge process,  $C_m$  (F g<sup>-1</sup>) represents specific capacitance of electrode materials and  $\Delta t$  (s) is discharge time of galvanostatic charge-discharge.

## 2. Supplementary Figures and Tables

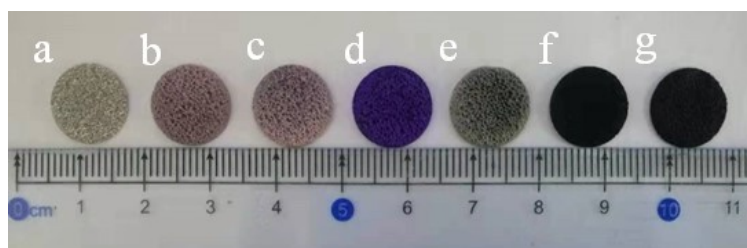

**Figure S1.** Images of a) NF, b) CF-NF, c) C-NF, d) ZC-NF, e) CNC-NF, f) NCC-NF, and g) CNNCC-NF.

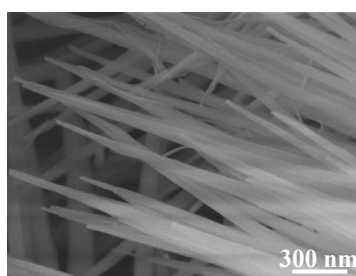

**Figure S2.** SEM image of C-NF.

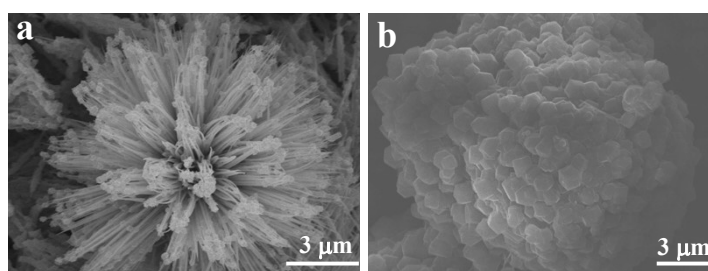

**Figure S3.** SEM images of a) ZIF-67/CoO-NF-1 (10 h), and b) ZIF-67/CoO-NF-3 (30 h).

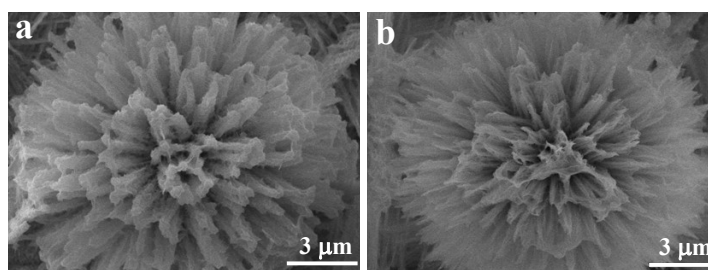

**Figure S4.** SEM images of a) Co-Ni LDH/CoO-NF-1 (12 h), and b) Co-Ni LDH/CoO-NF-3 (36 h).

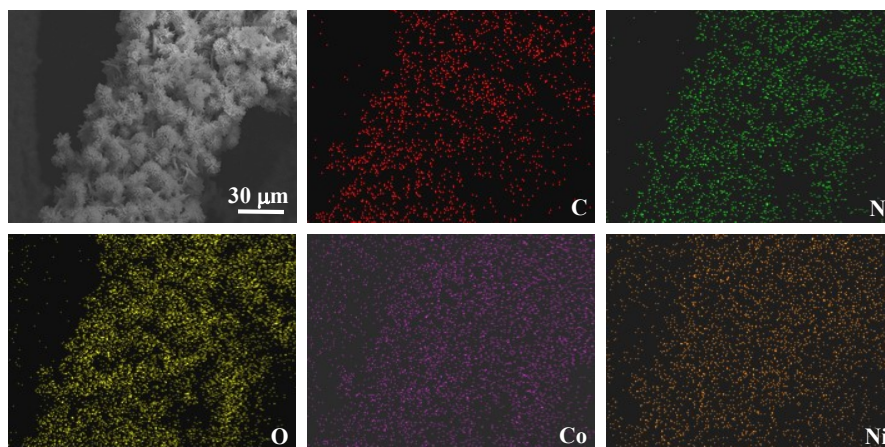

**Figure S5.** EDS elemental mapping of CNC-NF.

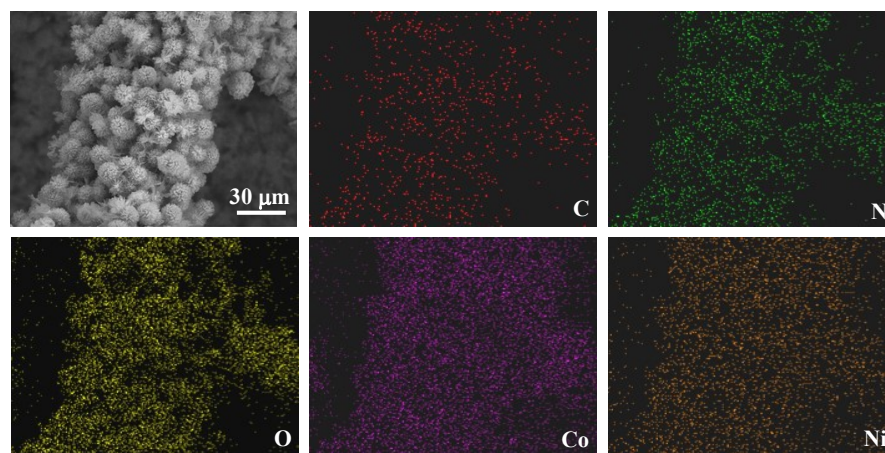

**Figure S6.** EDS elemental mapping of NCC-NF.

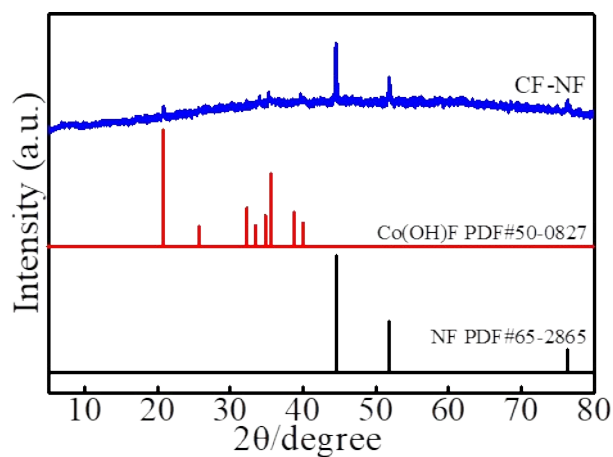

**Figure S7.** PXRD patterns of CF-NF.

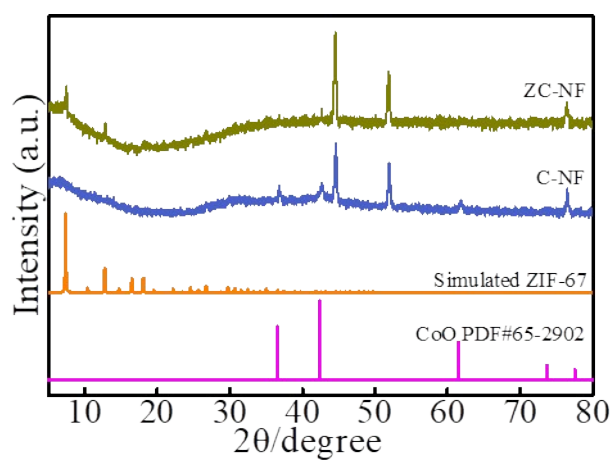

**Figure S8.** PXRD patterns of C-NF and ZC-NF.

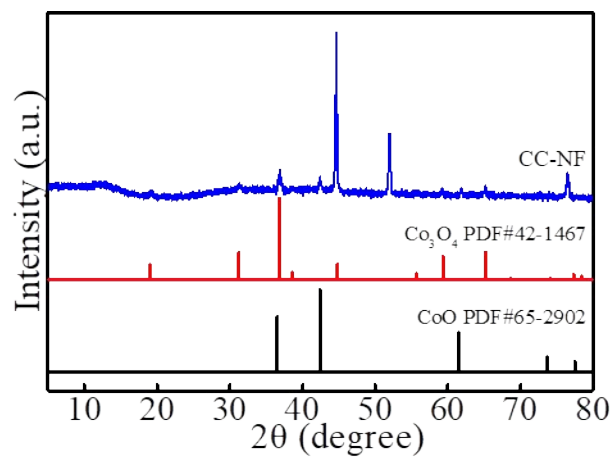

**Figure S9.** PXRD patterns of CC-NF.



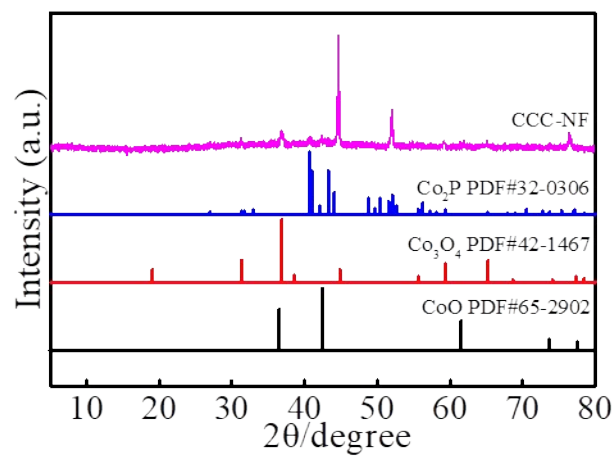

**Figure S10.** PXRD patterns of CCC-NF.

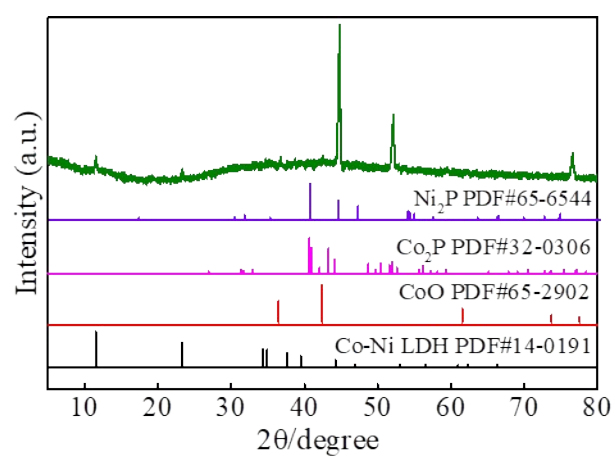

**Figure S11.** PXRD patterns of P-CNC-NF.

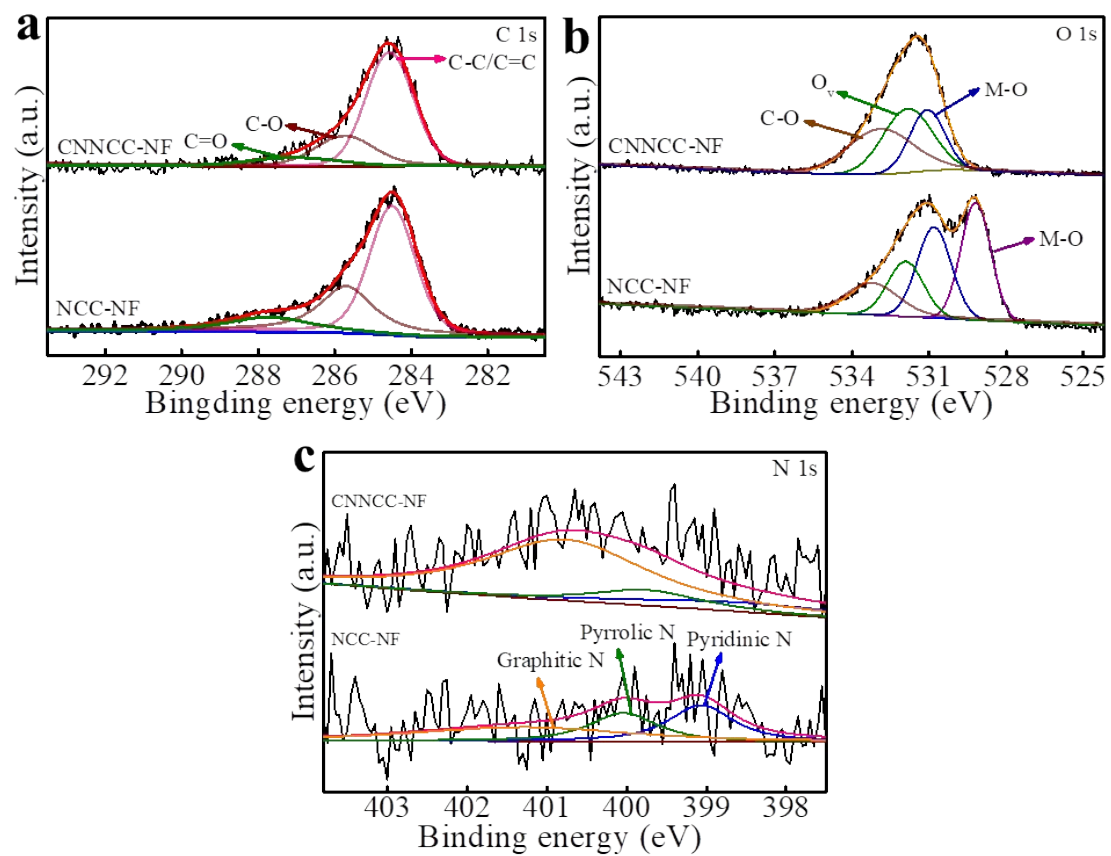

**Figure S12.** a, b and c) C 1s, O 1s and N 1s high-resolution XPS spectra of NCC-NF and CNNCC-NF.

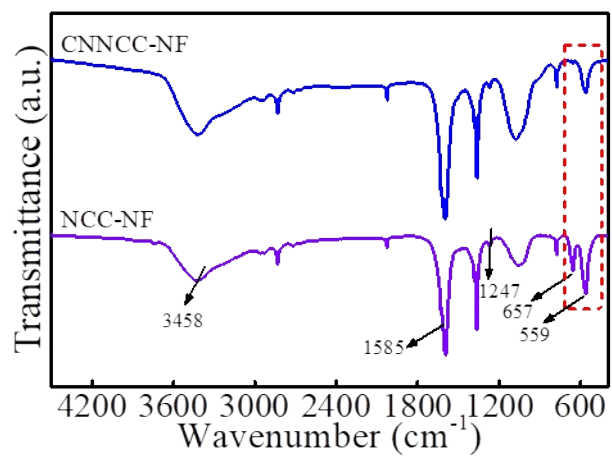

**Figure S13.** FTIR spectra of NCC-NF and CNNCC-NF.

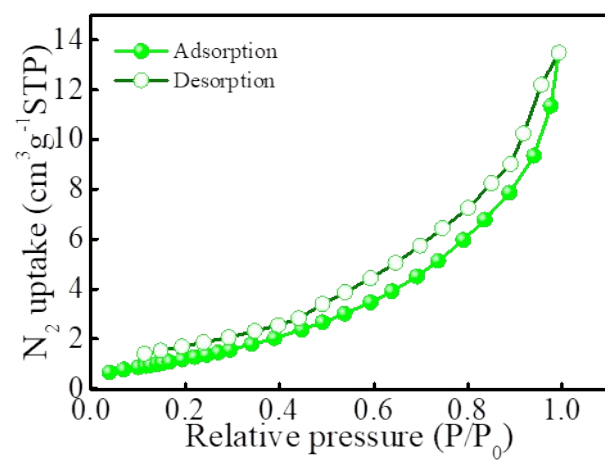

**Figure S14.** N<sub>2</sub> adsorption-desorption isotherms of C-NF.

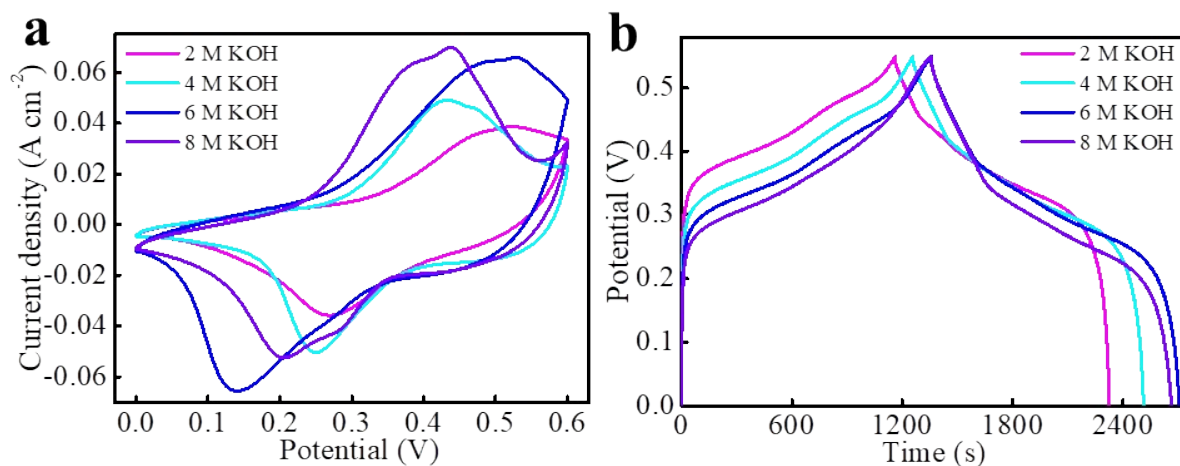

**Figure S15.** a) CV curves of CNNCC-NF at a scan rate of  $2 \text{ mV s}^{-1}$ , and b) GCD curves of CNNCC-NF at a current density of  $4 \text{ mA cm}^{-2}$  in 2, 4, 6, and 8 M KOH.

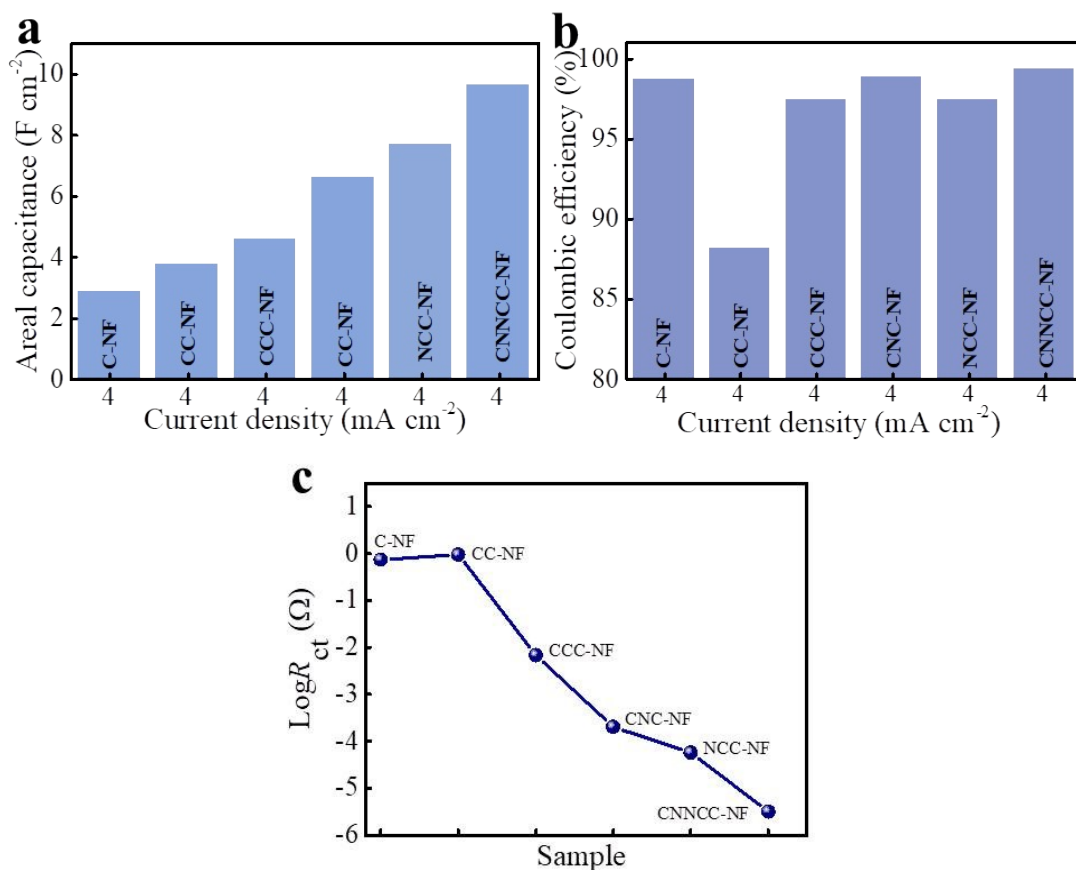

**Figure S16.** a) Areal capacitance and b) Coulombic efficiency at a current density of  $4\text{ mA cm}^{-2}$ , and c)  $R_{ct}$  of C-NF, CC-NF, CCC-NF, CNC-NF, NCC-NF and CNNCC-NF.

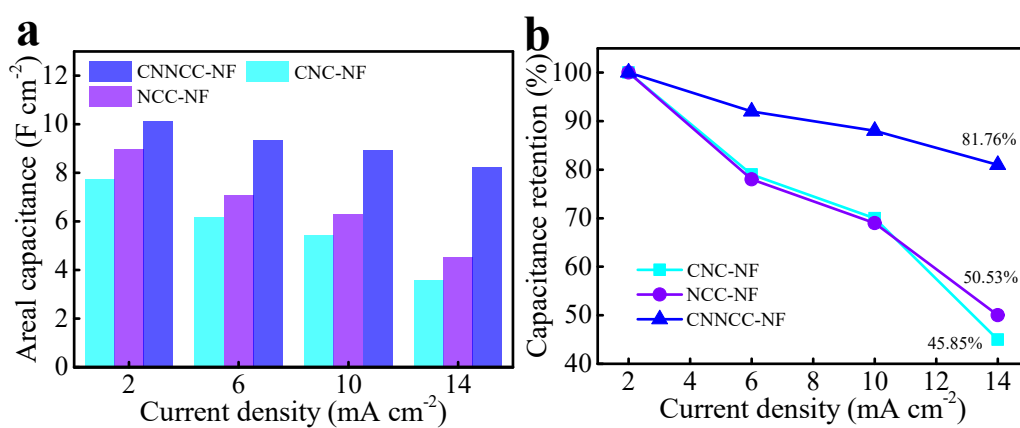

**Figure S17.** a) Areal capacitance and b) Capacitance retention at different current densities from  $2\text{ mA cm}^{-2}$  to  $14\text{ mA cm}^{-2}$  of CNC-NF, NCC-NF and CNNCC-NF.

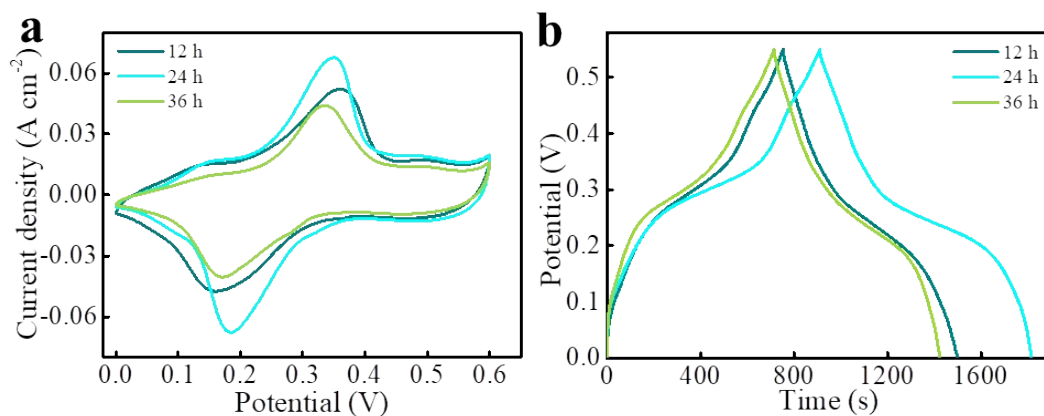

**Figure S18.** a) CV curves at a scan rate of  $4 \text{ mV s}^{-1}$ , and b) GCD curves at a current density of  $4 \text{ mA cm}^{-2}$  of CNC-NF on different etching and ion exchange time from 12 to 36 h.

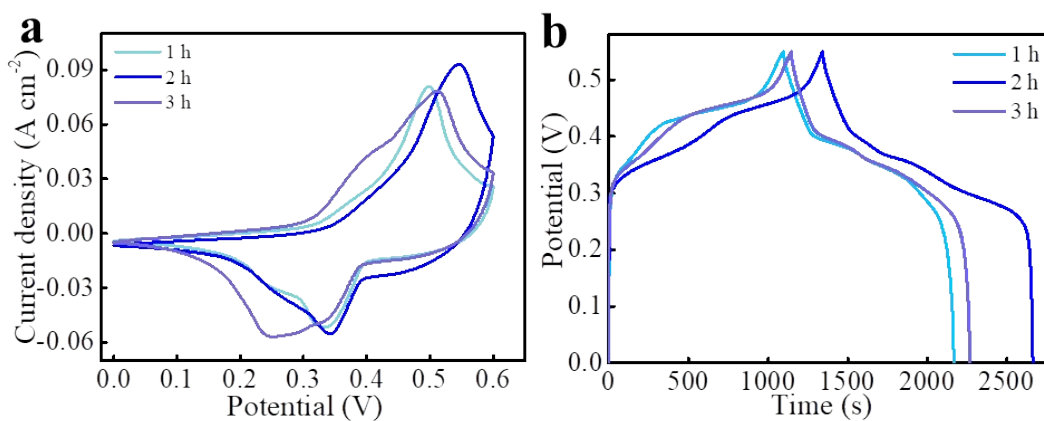

**Figure S19.** a) CV curves at a scan rate of  $4 \text{ mV s}^{-1}$ , and b) GCD curves at a current density of  $4 \text{ mA cm}^{-2}$  of CNNCC-NF on different phosphatization time from 1 to 3 h.

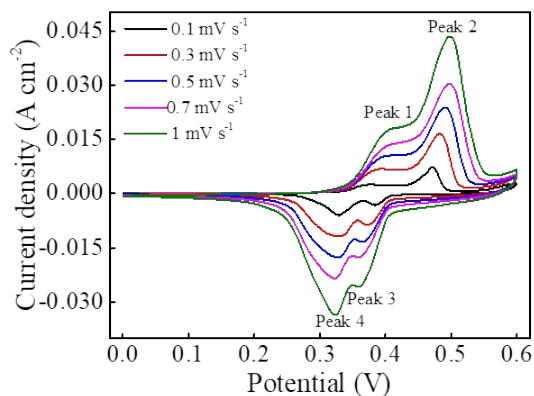

**Figure S20.** CV curves at different scan rates of CNNCC-NF.

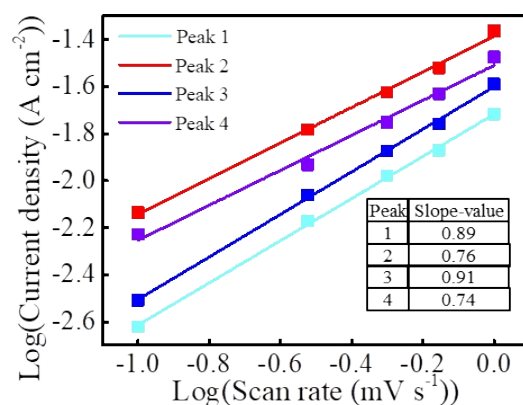

**Figure S21.** Linear relationship between logarithm of anodic peak current, cathode peak current and logarithm of scan rates.

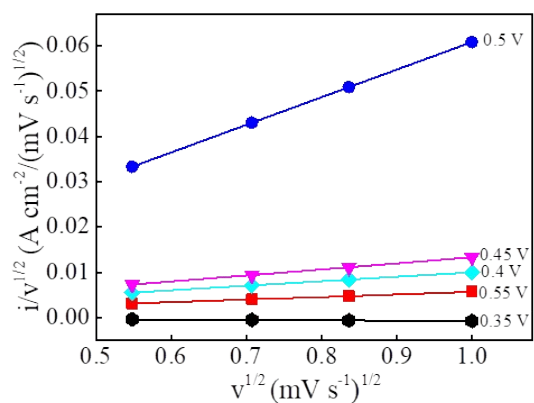

**Figure S22.** Linear relationship between  $i(V)/v^{1/2}$  and  $v^{1/2}$  used to calculate the constants of  $k_1$  and  $k_2$  at different potentials of CNNCC-NF.



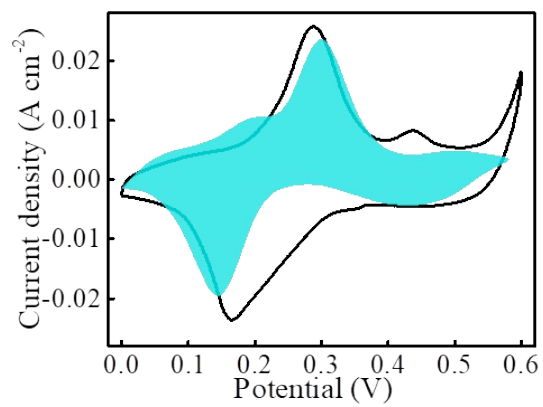

**Figure S23.** Capacitive charge storage contributions of CNC-NF.

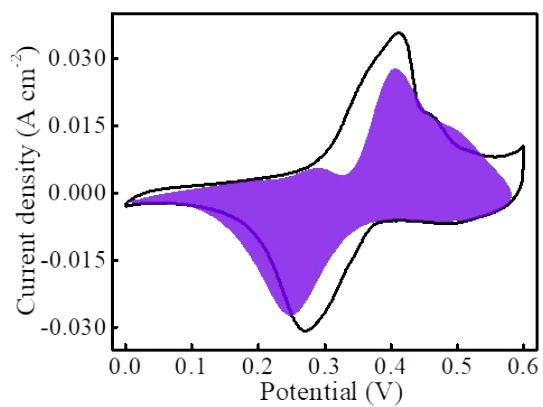

**Figure S24.** Capacitive charge storage contributions of NCC-NF.

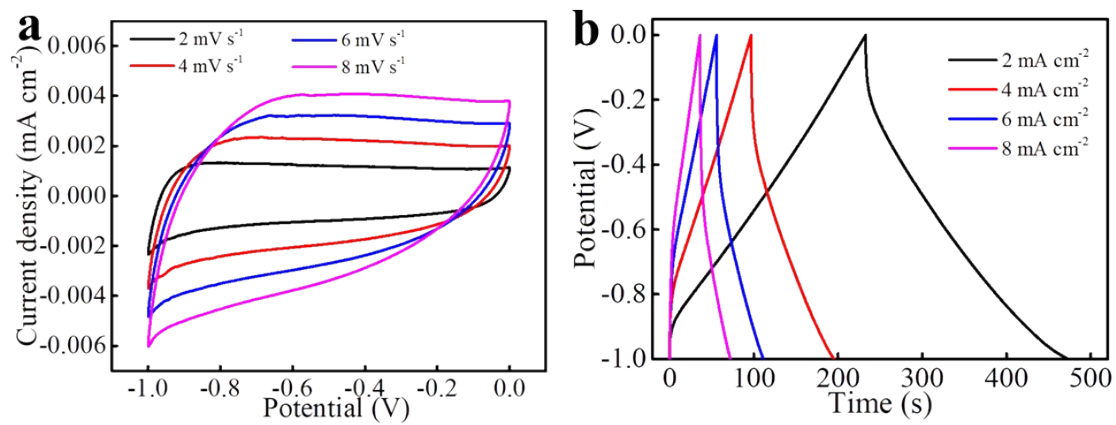

**Figure S25.** a) CV curves at different scan rates from 2 to 8  $\text{mV s}^{-1}$ , and b) GCD curves at different current densities from 2 to 8  $\text{mA cm}^{-2}$  of AC-NF.

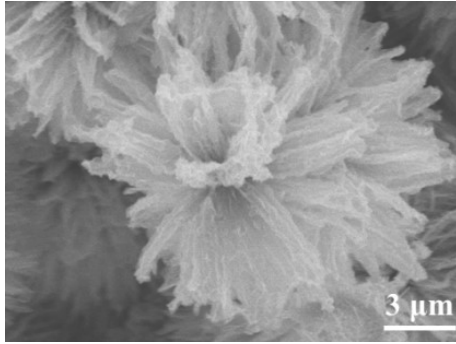

**Figure S26.** SEM images of CNNCC-NF after 10000 cycles GCD examination.

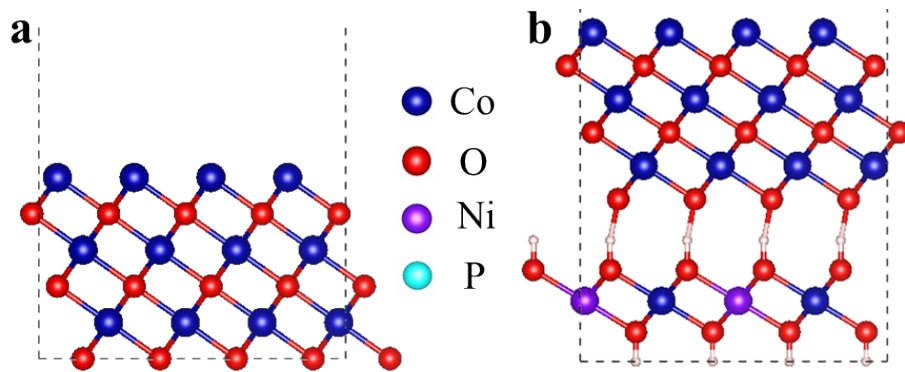

**Figure S27.** Interfacial compound model of a) C, and b) CNC.

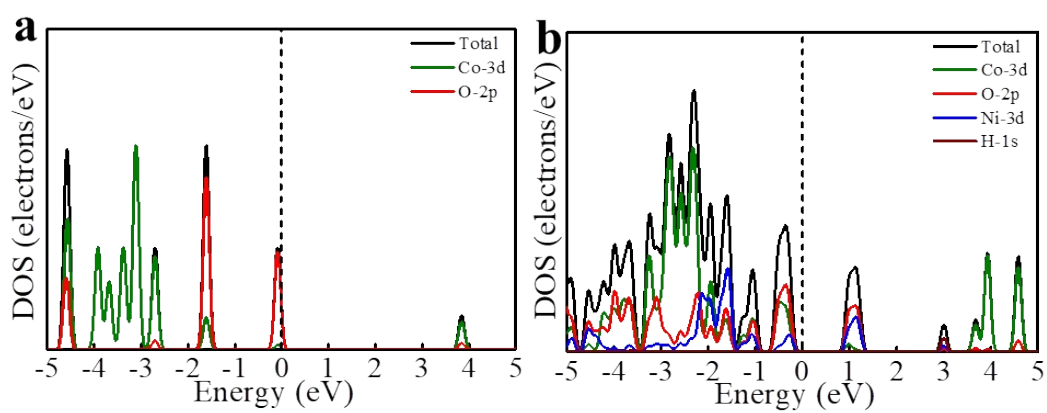

**Figure S28.** Density of states of a) C, and b) CNC.

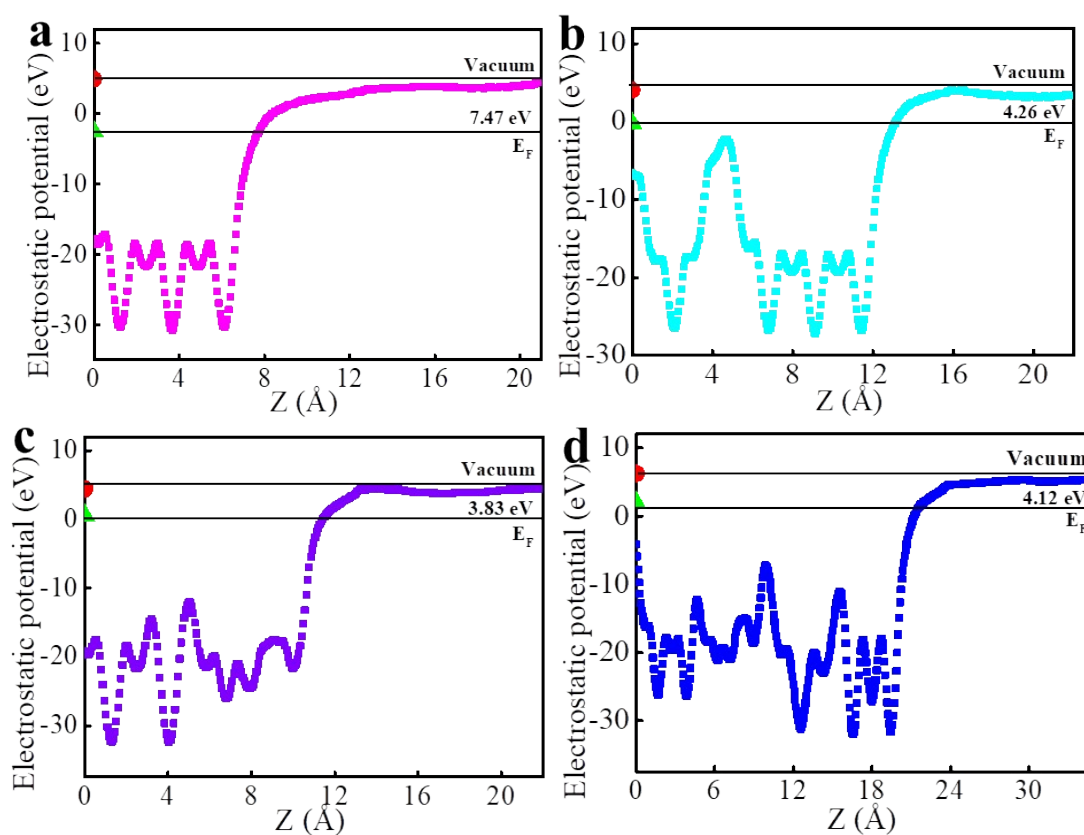

**Figure S29.** Work function of a) C, b) CNC, c) NCC, and d) CNNCC low-index surfaces.

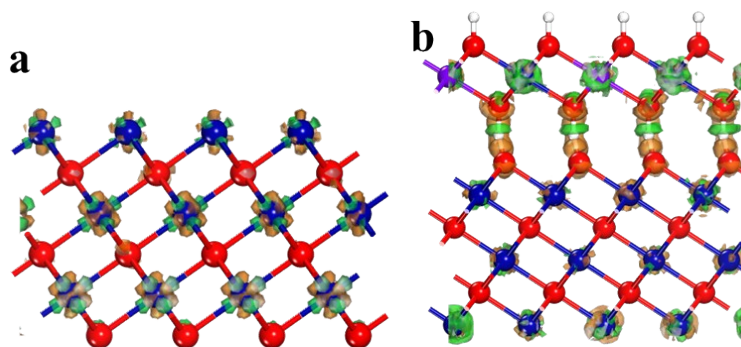

**Figure S30.** Electron density difference of a) C, and b) CNC.

**Table S1.** The fitting results of  $R_s$ ,  $R_{ct}$ ,  $C_{dl}$  and  $C_{ps}$  for C-NF, CC-NF, CCC-NF, CNC-NF, NCC-NF and CNNCC-NF electrodes.

| Electrodes | $R_s$ | $R_{ct}$              | $C_{dl}$             | $C_{ps}$ |
|------------|-------|-----------------------|----------------------|----------|
| C-NF       | 0.92  | 0.75                  | $1.6 \times 10^{-2}$ | 0.17     |
| CC-NF      | 0.62  | 0.95                  | $6.4 \times 10^{-2}$ | 0.41     |
| CCC-NF     | 0.75  | $6.83 \times 10^{-3}$ | $5.2 \times 10^{-2}$ | 0.20     |
| CNC-NF     | 0.65  | $2.03 \times 10^{-4}$ | $1.7 \times 10^{-3}$ | 0.33     |
| NCC-NF     | 1.39  | $5.75 \times 10^{-5}$ | $1.6 \times 10^{-3}$ | 0.085    |
| CNNCC-NF   | 0.71  | $3.2 \times 10^{-6}$  | $1.3 \times 10^{-3}$ | 0.043    |

**Table S2.** Comparison of CNNCC-NF with various Ni/Co based electrodes materials for ASCs.

| Type                                                      | Morphology                          | Electrolyte | Current density         | Capacitance               | Ref.             |
|-----------------------------------------------------------|-------------------------------------|-------------|-------------------------|---------------------------|------------------|
| NiCo-LDH@Au-CuO/Cu                                        | Array                               | 3 M KOH     | 1.5 mA cm <sup>-2</sup> | 1.97 F cm <sup>-2</sup>   | 7                |
| Co <sub>1-x</sub> S/CoFe <sub>2</sub> O <sub>4</sub> @rGO | Nanoflowers                         | 2 M KOH     | 1 A g <sup>-1</sup>     | 2202 F g <sup>-1</sup>    | 8                |
| Ni-Mo-S@Ni-P                                              | Composite                           | 3 M KOH     | 1 A g <sup>-1</sup>     | 1770 F g <sup>-1</sup>    | 9                |
| Ni/P/N/C-500                                              | Composites                          | 6 M KOH     | 1 A g <sup>-1</sup>     | 979.8 F g <sup>-1</sup>   | 10               |
| Co-Fe-Mn phosphide                                        | Nanoflakes                          | 1 M KOH     | 2 mA cm <sup>-2</sup>   | 4.36 F cm <sup>-2</sup>   | 11               |
| CoP                                                       | Nanowire                            | 1 M LiCl    | 1 mA cm <sup>-2</sup>   | 571.3 mF cm <sup>-2</sup> | 12               |
| <b>CNNCC-NF</b>                                           | Spiny globe with flat leaves-shaped | 6 M KOH     | 2 mA cm <sup>-2</sup>   | 10.11 F cm <sup>-2</sup>  | <b>This work</b> |
| <b>CNNCC-NF</b>                                           | Spiny globe with flat leaves-shaped | 6 M KOH     | 1.05 A g <sup>-1</sup>  | 2528.23 F g <sup>-1</sup> | <b>This work</b> |

**Table S3.** The comparative electrochemical performance for ASCs based on the Co/Ni and P-doped electrodes.

| Device                                                        | Electrolyte                         | Window (V) | Energy density (Wh kg <sup>-1</sup> ) | Power density (W kg <sup>-1</sup> ) | Ref.             |
|---------------------------------------------------------------|-------------------------------------|------------|---------------------------------------|-------------------------------------|------------------|
| Co <sub>1-x</sub> S/CoFe <sub>2</sub> O <sub>4</sub> @rGO//AC | 2 M KOH                             | 1.4        | 61.5                                  | 700                                 | Ref. 8           |
| 0.1Cu-MOF/Cu <sub>2+1</sub> O//AC                             | 6 M KOH                             | 1.5        | 25.67                                 | 740.4                               | Ref. 13          |
| Zn-Ni-P-S//AC                                                 | 3 M KOH                             | 1.6        | 29.1                                  | 275.54                              | Ref. 9           |
| Co-Fe-Mn phosphide//AC                                        | 1 M KOH                             | 1.6        | 53.2                                  | 399.7                               | Ref. 14          |
| Co <sub>3</sub> O <sub>4</sub> /NH//AC                        | 2 M KOH                             | 1.5        | 34.5                                  | 753                                 | Ref. 15          |
| P-Co <sub>3</sub> O <sub>4</sub> @P,N-C//Co@P,N-C             | PVA/KOH                             | 1.5        | 47.6                                  | 750                                 | Ref. 11          |
| P-doped MoS <sub>2</sub> //MnO <sub>2</sub>                   | PVA/Na <sub>2</sub> SO <sub>4</sub> | 1.7        | 67.4                                  | 850                                 | Ref. 16          |
| CNNCC-NF//AC-NF                                               | 6 M KOH                             | 1.6        | 84.03                                 | 364.40                              | <b>This work</b> |



## References

- 1 G. Kresse, J. Furthmuller, *Phys. Rev. B*, 1996, **54**, 11169-11186.
- 2 G. Kresse, J. Furthmuller, *Comput. Mater. Sci.*, 1996, **6**, 15-50.
- 3 J. P. Perdew, K. Burke, M. Ernzerhof, *Phys. Rev. Lett.*, 1997, **78**, 1396-1396.
- 4 G. Kresse, D. Joubert, *Phys. Rev. B*, 1999, **59**, 1758-1775.
- 5 P. E. Blochl, *Phys. Rev. B*, 1994, **50**, 17953-17979.
- 6 S. N. Steinmann, C. Corminboeuf, *J. Chem. Theory Comput.*, 2010, **6**, 1990-2001.
- 7 Y. Guo, X. Hong, Y. Wang, Q. Li, J. Meng, R. Dai, X. Liu, L. He, L. Mai, *Adv. Funct. Mater.*, 2019, **29**, 1809004.
- 8 C. Ren, X. Jia, W. Zhang, D. Hou, Z. Xia, D. Huang, J. Hu, S. Chen, S. Gao, *Adv. Funct. Mater.*, 2020, **30**, 2004519.
- 9 X. Lei, S. Ge, T.-Y. Yang, Y. Lu, Y.-L. Chueh, B. Xiang, *J. Power Sources*, 2020, **477**, 229022.
- 10 F. Yu, X. Xiong, L.-Y. Zhou, J.-L. Li, J.-Y. Liang, S.-Q. Hu, W.-T. Lu, B. Li, H.-C. Zhou, *J. Mater. Chem. A*, 2019, **7**, 2875-2883.
- 11 R. Niu, G. Wang, Y. Ding, S. Tang, X. Hu, J. Zhu, *J. Mater. Chem. A*, 2019, **7**, 4431-4437.
- 12 N. Zhang, J. Xu, B. Wei, J. Li, I. Amorim, R. Thomas, S. M. Thalluri, Z. Wang, W. Zhou, S. Xie, L. Liu, *ACS Appl. Energy Mater.*, 2020, **3**, 4580-4588.
- 13 X. Cao, L. Cui, B. Liu, Y. Liu, D. Jia, W. Yang, J. M. Razal, J. Liu, *J. Mater. Chem. A*, 2019, **7**, 3815-3827.
- 14 S. Liu, Y. Yin, Y. Shen, K. S. Hui, Y. T. Chun, J. M. Kim, K. N. Hui, L. Zhang, S. C. Jun, *Small*, 2020, **16**, 1906458.
- 15 T. Liu, L. Zhang, W. You, J. Yu, *Small*, 2018, **14**, 1702407.
- 16 S. Liu, Y. Yin, M. Wu, K. S. Hui, K. N. Hui, C.-Y. Ouyang, S. C. Jun, *Small*, 2019, **15**, 1803984.
